# Supplementary material for: Epigenetic regulation of intestinal peptide transporter PEPT1 as a potential strategy for colorectal cancer sensitization
Source: PubMed Central journal article supplement (PMC8144210; doi:10.1038/s41419-021-03814-5), 2021-05-24
Supplement: 41419_2021_3814_MOESM2_ESM.pdf [file 41419_2021_3814_MOESM2_ESM.pdf]

Figure1D

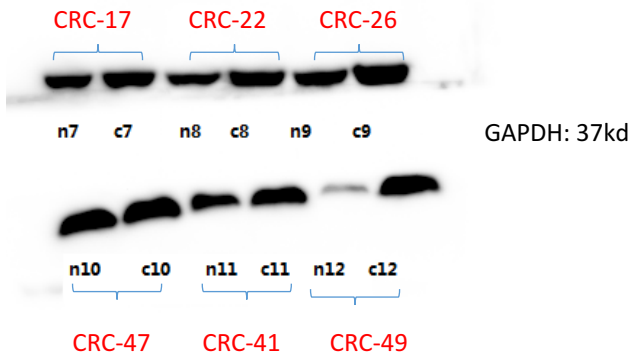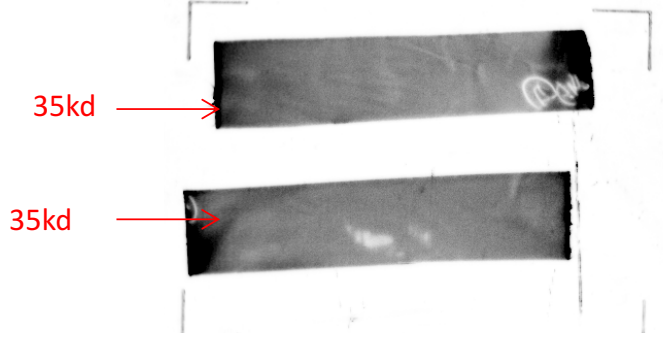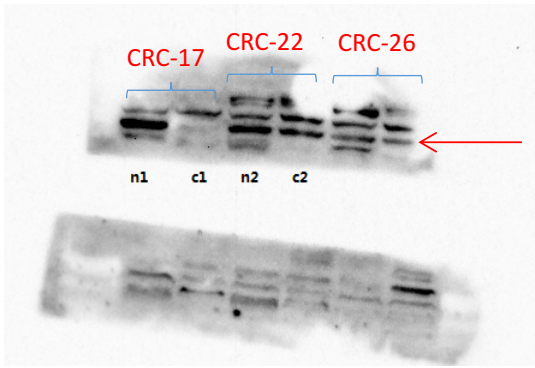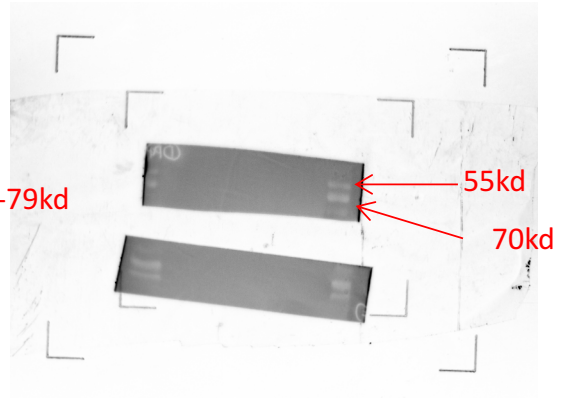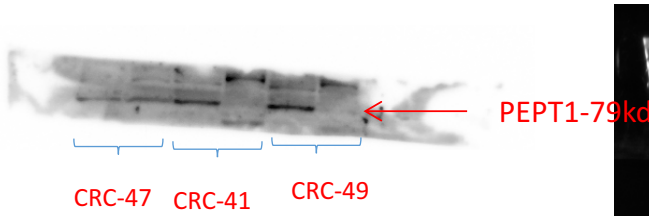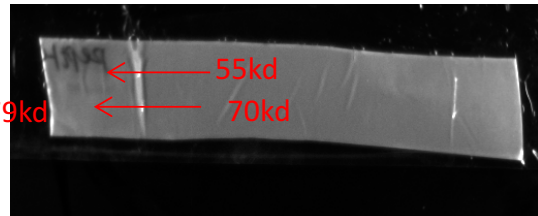

Figure1D

The marker of GAPDH is not detected

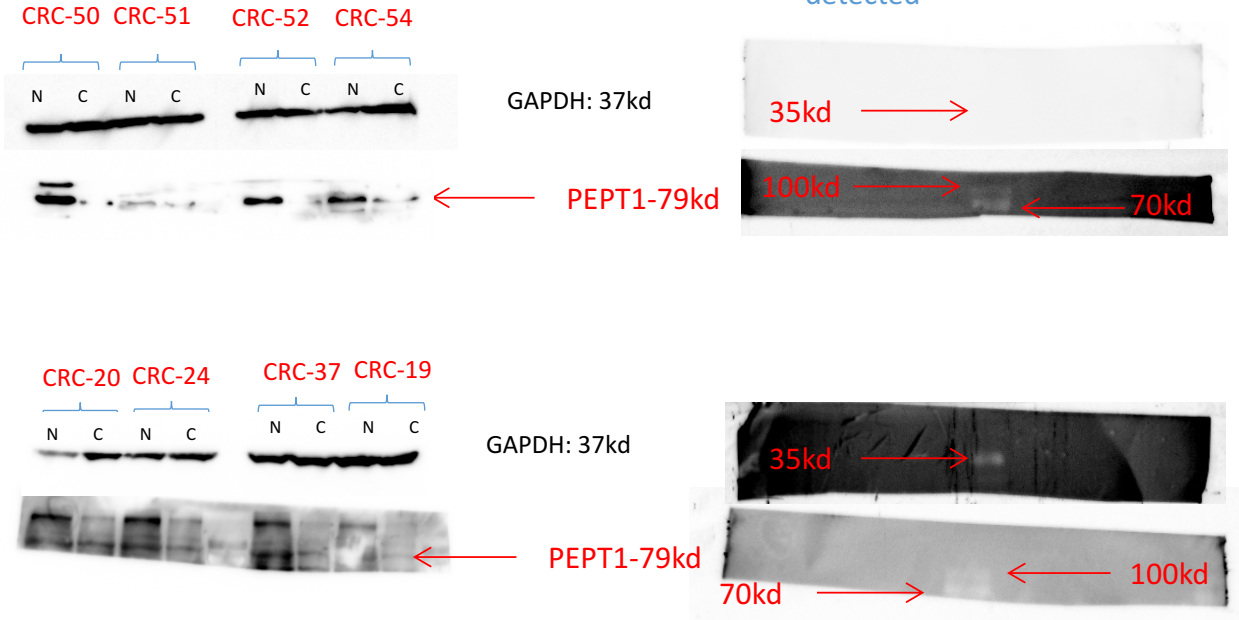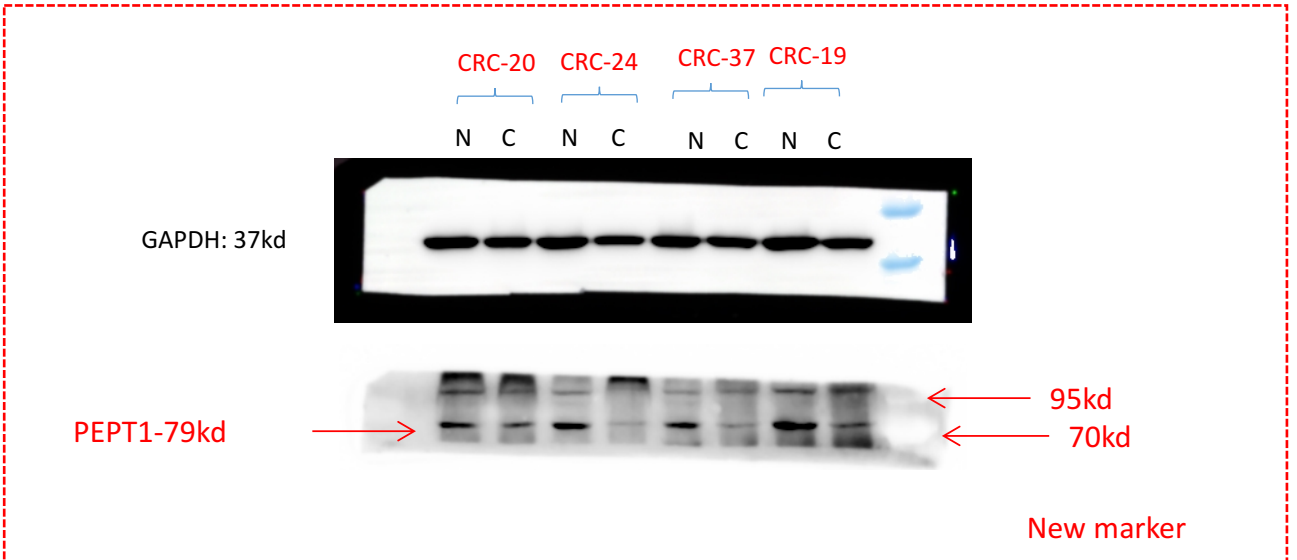

We used different instrument to expose the western blot bands of these 4 paired CRC tissues in contrast to previous CRC tissues, which is the same as all the bands of CRC cells.

Figure2B

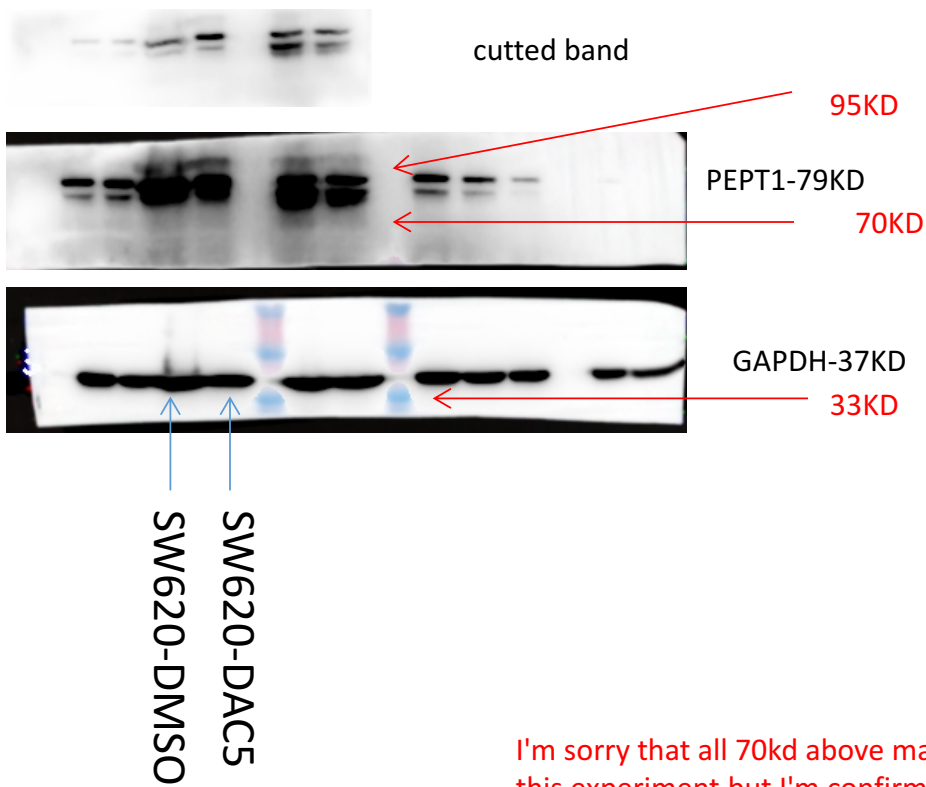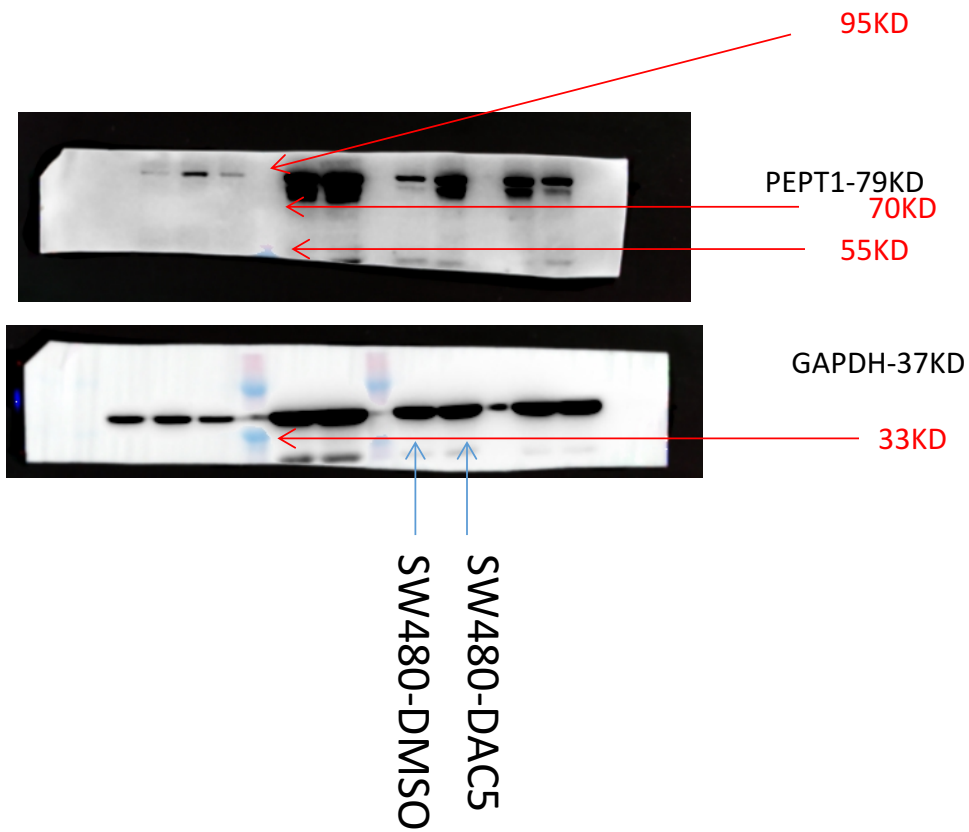

Figure2E

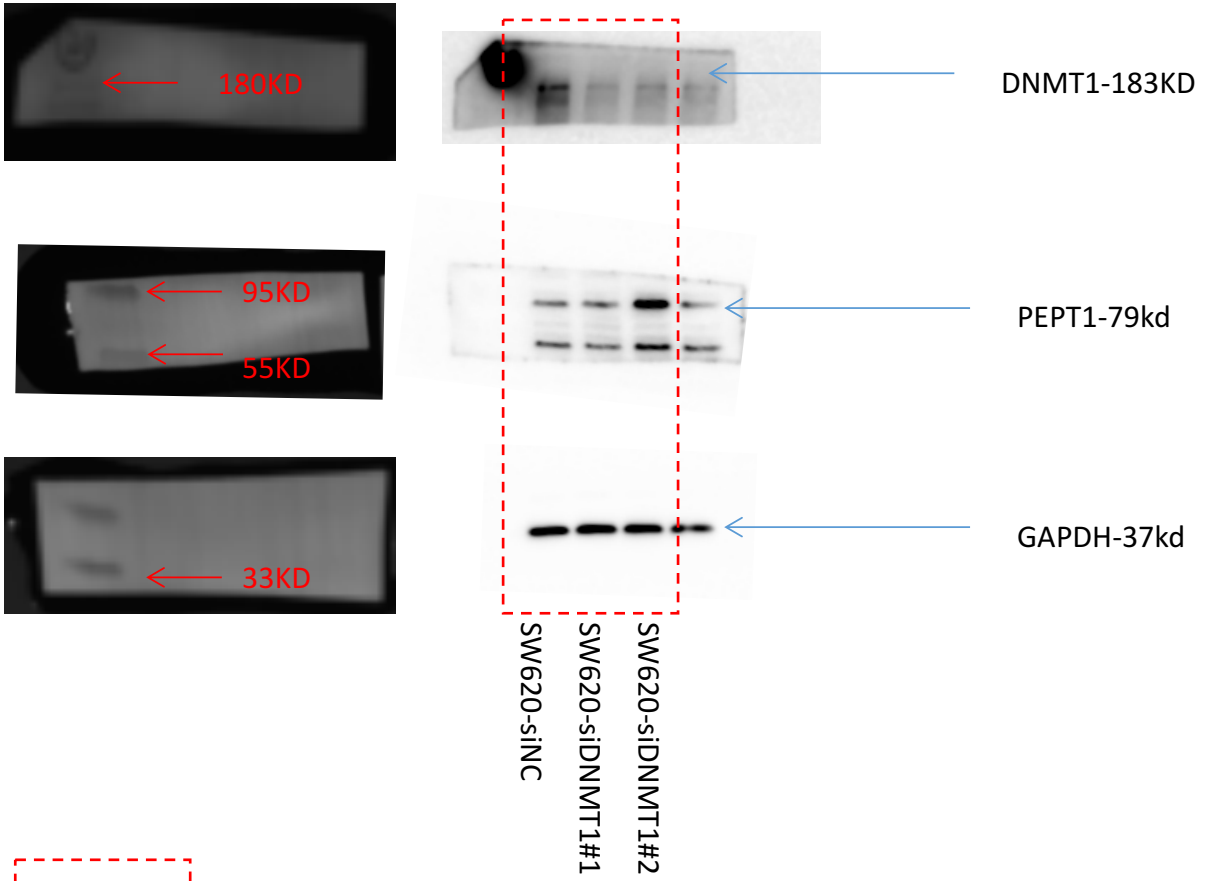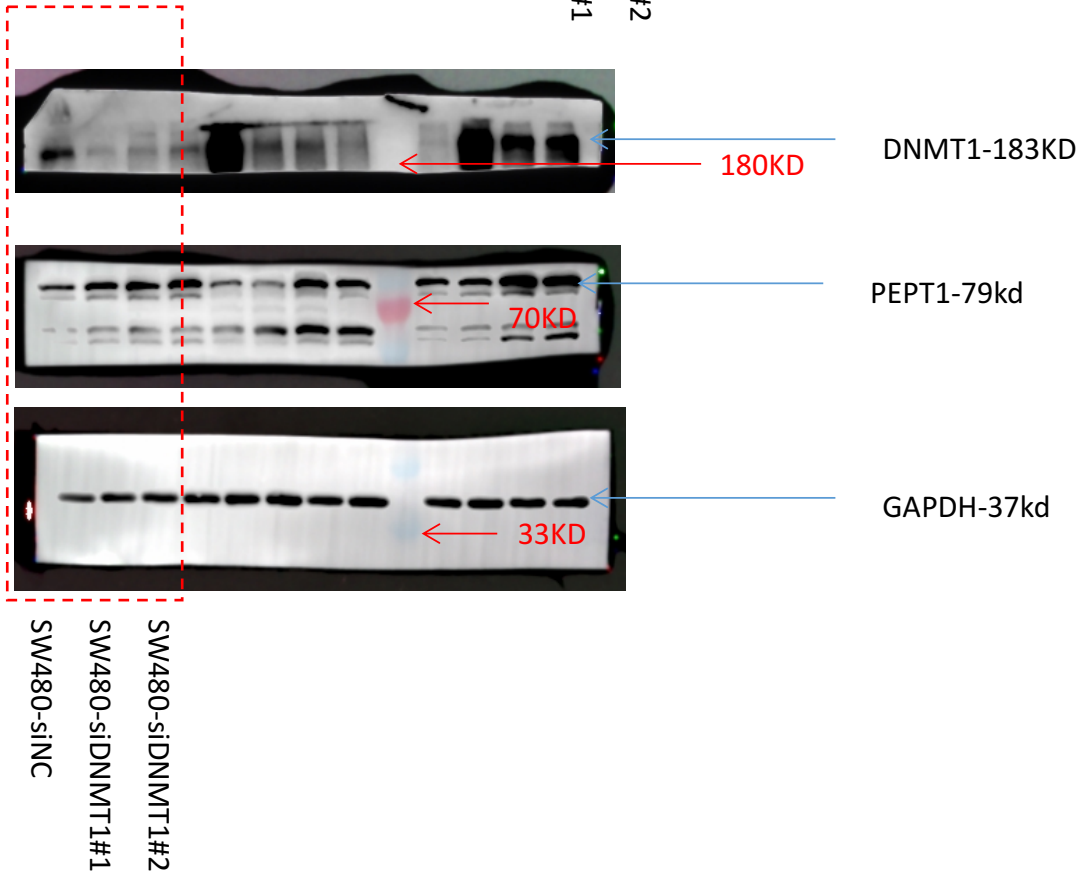

Figure4B

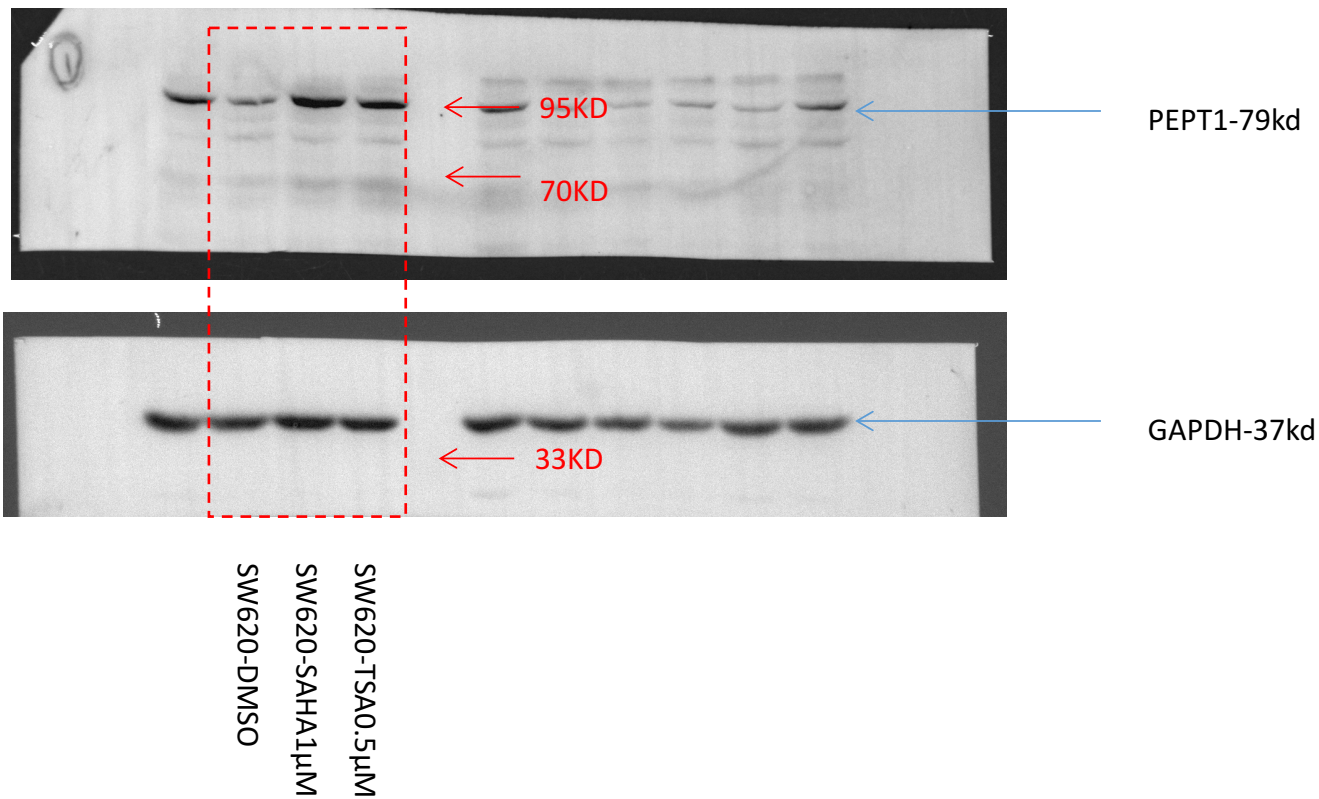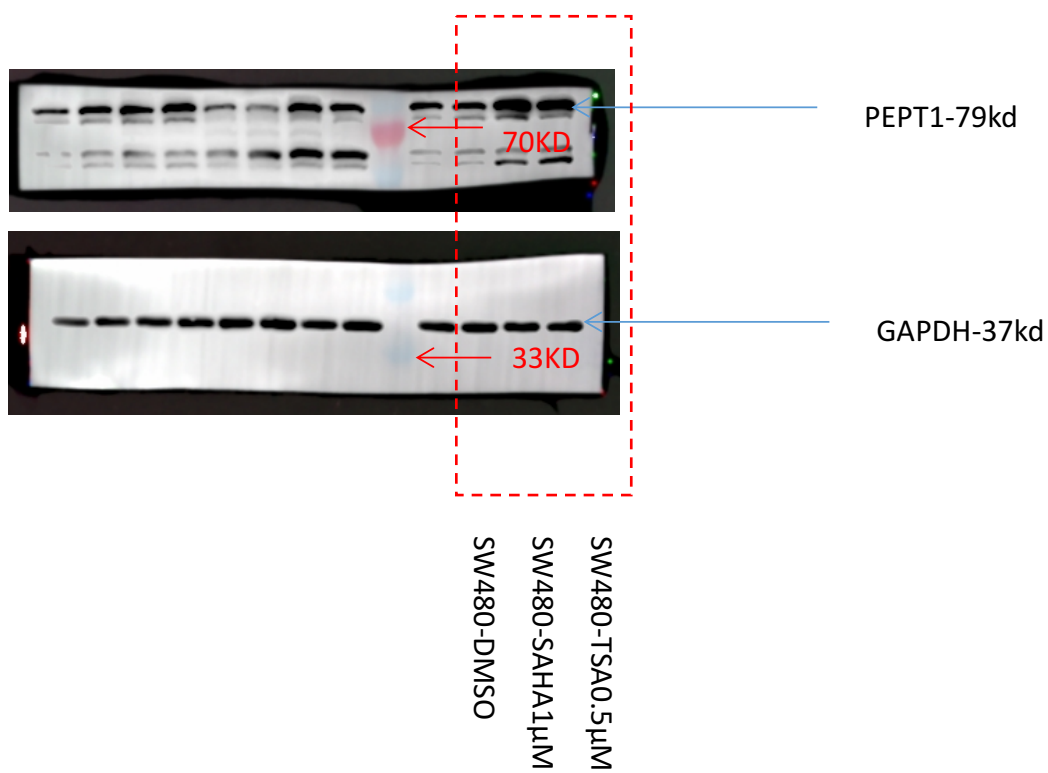

Figure4D

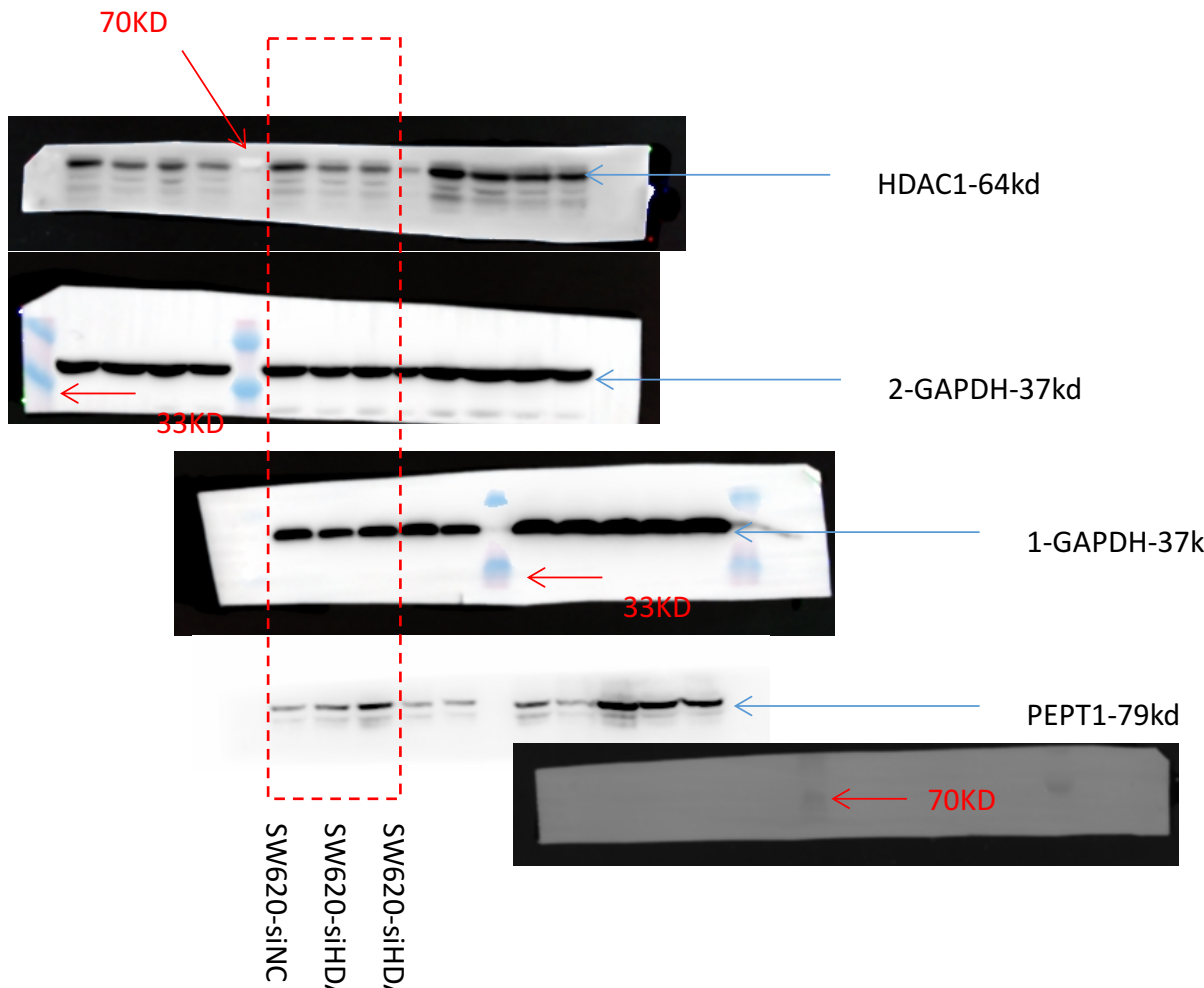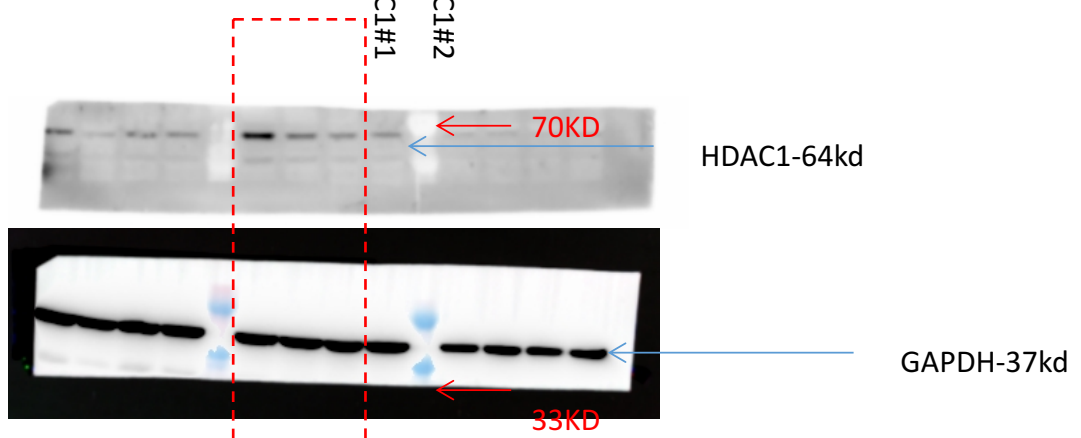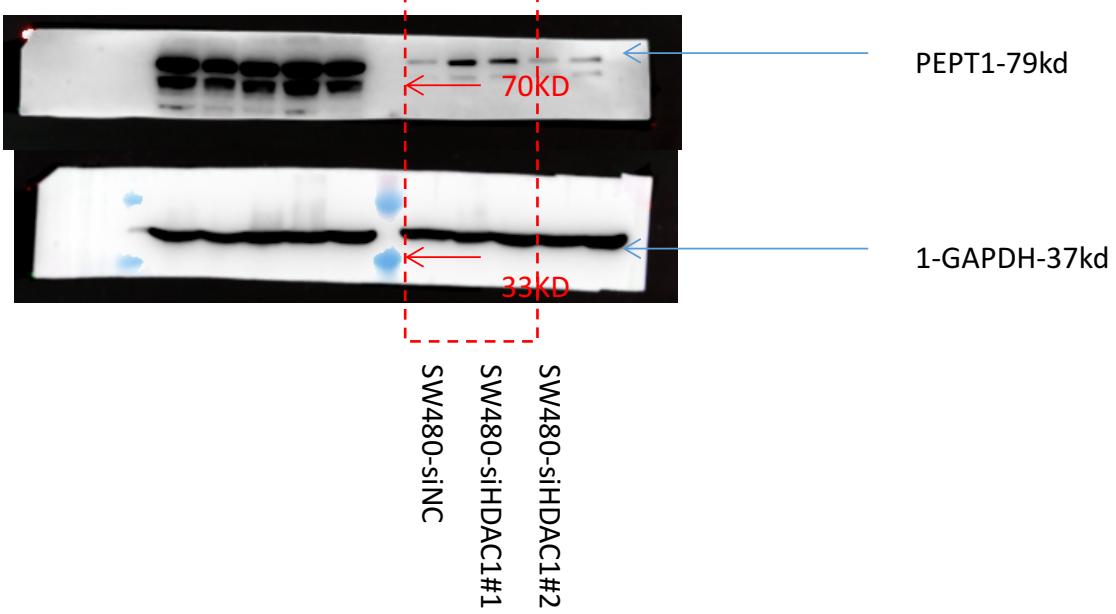

Figure5D

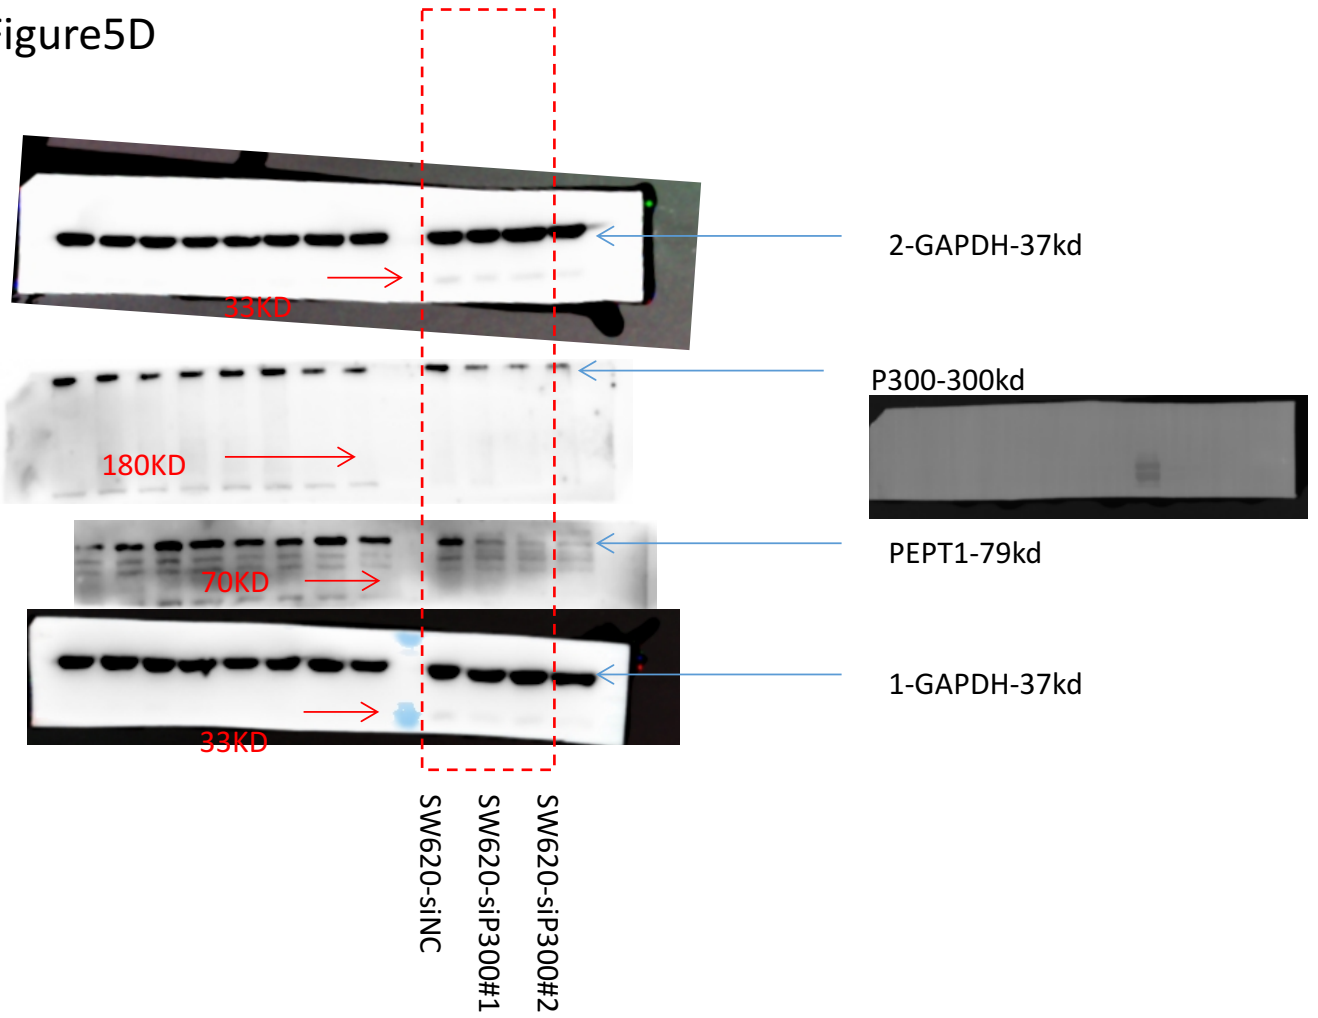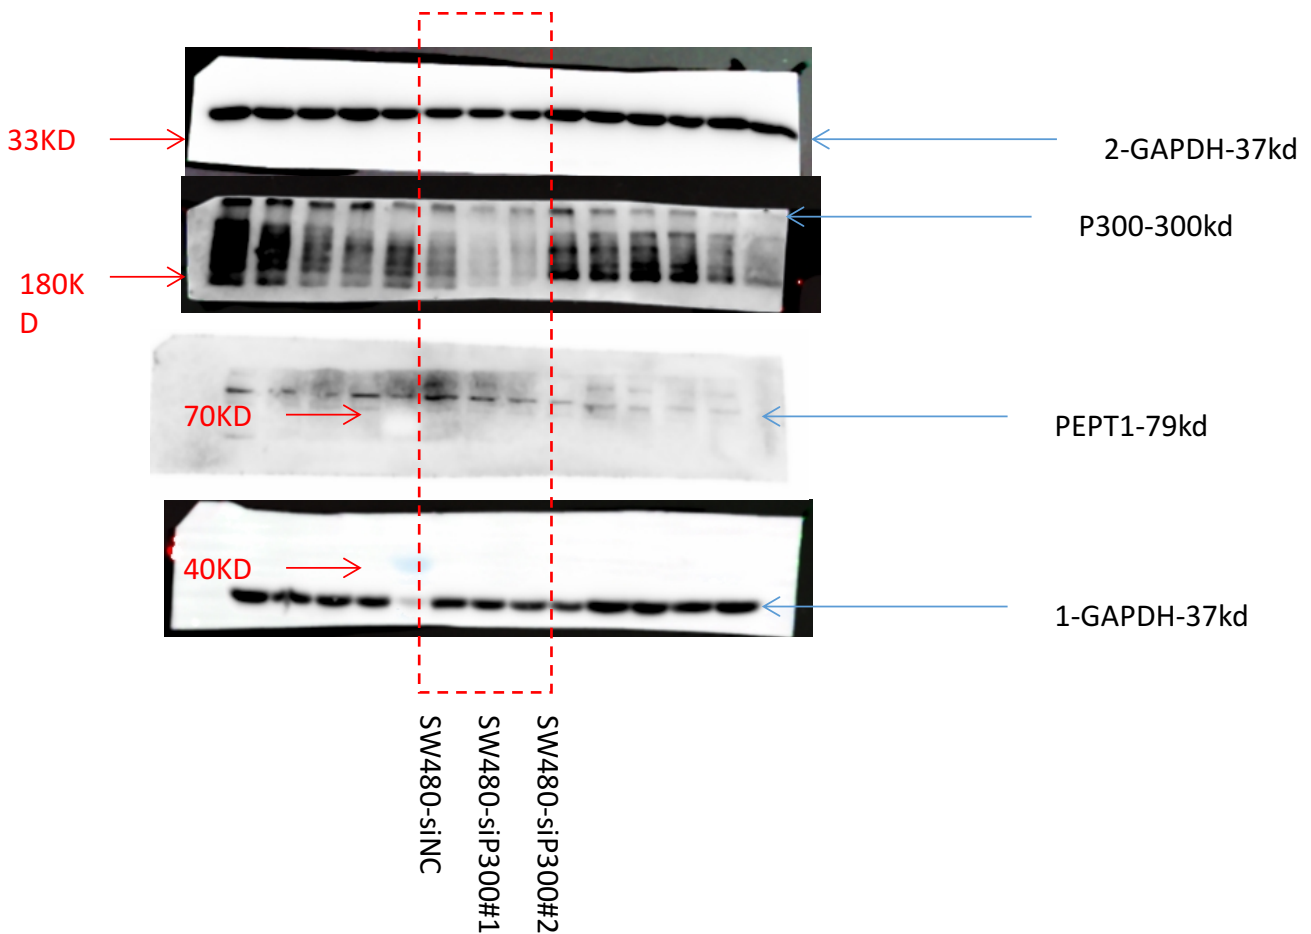

FigureS6B

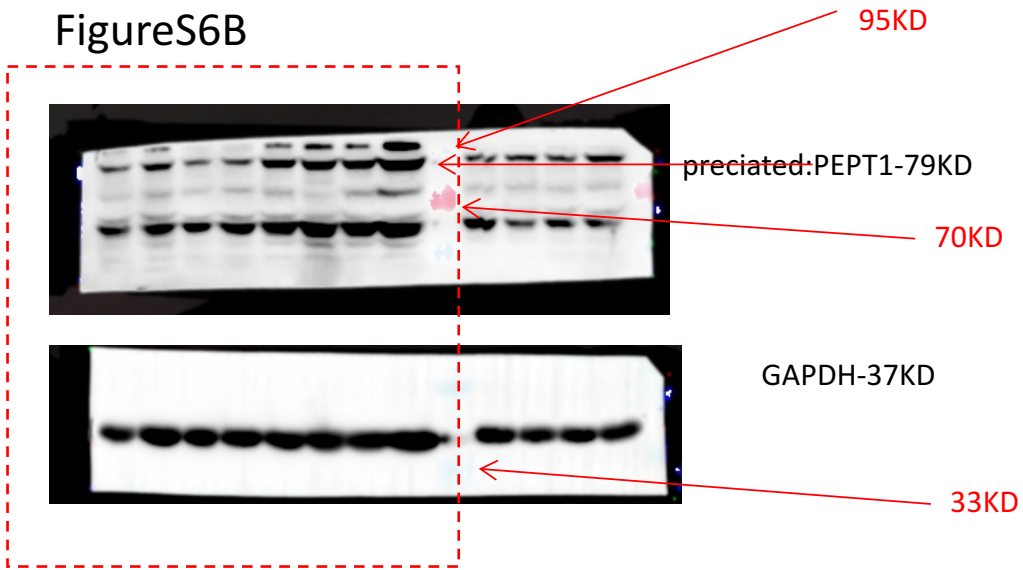

Sw620-xenografts: NC-3 NC-4 Ube-4 Ube-5 DAC-1 DAC-3 D+U-2 D5+U Marker

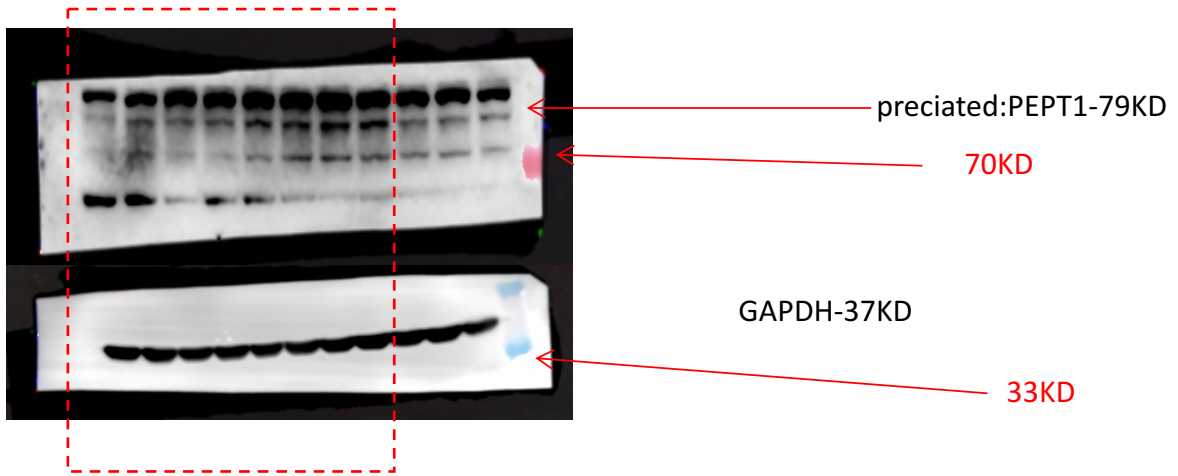

SW480-xenografts : NC-2 NC-5 Ube-1 Ube-3 DAC-1 DAC-3 D+U-2 D+U-4
